# Supplementary material
Source: PubMed Central journal article supplement (PMC5675003)
Supplement: NIHMS877212-supplement-Appendix.pdf [file NIHMS877212-supplement-Appendix.pdf]

# Online Appendix

**Table A1**

|            | <i>Weekend commencing Friday night</i> |                    |            |                   |                    |            |                   |                    |            | <i>Weekend commencing Saturday day</i> |                    |            |                   |                    |            |                   |                    |            |
|------------|----------------------------------------|--------------------|------------|-------------------|--------------------|------------|-------------------|--------------------|------------|----------------------------------------|--------------------|------------|-------------------|--------------------|------------|-------------------|--------------------|------------|
|            | Day starts at 7am                      |                    |            | Day starts at 8am |                    |            | Day starts at 9am |                    |            | Day starts at 7am                      |                    |            | Day starts at 8am |                    |            | Day starts at 9am |                    |            |
|            | <i>Night (N)</i>                       | <i>Weekend (D)</i> | <i>NxD</i> | <i>Night (N)</i>  | <i>Weekend (D)</i> | <i>NxD</i> | <i>Night (N)</i>  | <i>Weekend (D)</i> | <i>NxD</i> | <i>Night (N)</i>                       | <i>Weekend (D)</i> | <i>NxD</i> | <i>Night (N)</i>  | <i>Weekend (D)</i> | <i>NxD</i> | <i>Night (N)</i>  | <i>Weekend (D)</i> | <i>NxD</i> |
| Female     | 0.2073                                 | 0.1092             | 0.1297     | 0.2381            | 0.0789             | 0.1161     | 0.3809            | 0.0689             | 0.0431     | 0.0718                                 | 0.0052             | 0.7575     | 0.1102            | 0.0068             | 0.5411     | 0.1857            | 0.0047             | 0.3197     |
| Age        | 0.7106                                 | 0.0673             | 0.5721     | 0.8443            | 0.0435             | 0.5232     | 0.7677            | 0.0531             | 0.5434     | 0.7368                                 | 0.0610             | 0.6098     | 0.8272            | 0.0517             | 0.4814     | 0.7391            | 0.0466             | 0.5887     |
| Graduate   | 0.0323                                 | 0.8805             | 0.0877     | 0.0222            | 0.8816             | 0.0529     | 0.0570            | 0.9029             | 0.1185     | 0.0346                                 | 0.9385             | 0.1036     | 0.0318            | 0.8554             | 0.1097     | 0.0504            | 0.9933             | 0.0954     |
| Over \$35k | 0.0043                                 | 0.9937             | 0.6005     | 0.0050            | 0.9910             | 0.4967     | 0.0811            | 0.8761             | 0.9241     | 0.0018                                 | 0.5372             | 0.2583     | 0.0027            | 0.6703             | 0.2649     | 0.0664            | 0.7082             | 0.7537     |
| Democrat   | 0.9774                                 | 0.4731             | 0.8938     | 0.8893            | 0.5925             | 0.9443     | 0.9408            | 0.9940             | 0.7448     | 0.9612                                 | 0.5098             | 0.8508     | 0.8890            | 0.5986             | 0.9386     | 0.7214            | 0.5232             | 0.3395     |
| God        | 0.3575                                 | 0.2767             | 0.1974     | 0.5304            | 0.2741             | 0.1777     | 0.0609            | 0.2787             | 0.3829     | 0.3346                                 | 0.2325             | 0.2411     | 0.5315            | 0.2740             | 0.1800     | 0.0589            | 0.2599             | 0.4118     |
| Risk       | 0.0148                                 | 0.1185             | 0.0378     | 0.0025            | 0.1281             | 0.0455     | 0.0061            | 0.1313             | 0.0951     | 0.0321                                 | 0.3854             | 0.1672     | 0.0061            | 0.3948             | 0.1843     | 0.0147            | 0.4296             | 0.3425     |
| Trust      | 0.3771                                 | 0.1204             | 0.3894     | 0.4663            | 0.1370             | 0.6019     | 0.1257            | 0.1934             | 0.8280     | 0.2529                                 | 0.0343             | 0.7747     | 0.3390            | 0.0461             | 0.9930     | 0.0680            | 0.0519             | 0.3869     |
| Log(Exp.)  | 0.0000                                 | 0.0001             | 0.4154     | 0.0000            | 0.0001             | 0.4029     | 0.0000            | 0.0001             | 0.3575     | 0.0000                                 | 0.0000             | 0.7719     | 0.0000            | 0.0000             | 0.6425     | 0.0000            | 0.0000             | 0.6879     |
| Log(Time)  | 0.0000                                 | 0.0046             | 0.0275     | 0.0000            | 0.0067             | 0.0752     | 0.0000            | 0.0086             | 0.0301     | 0.0000                                 | 0.0001             | 0.2570     | 0.0000            | 0.0004             | 0.3512     | 0.0000            | 0.0003             | 0.2377     |
| Passed all | 0.0917                                 | 0.0011             | 0.8379     | 0.2242            | 0.0012             | 0.6859     | 0.3319            | 0.0025             | 0.2947     | 0.0746                                 | 0.0006             | 0.9783     | 0.2017            | 0.0008             | 0.7719     | 0.2368            | 0.0005             | 0.5547     |
| Usual time | 0.0000                                 | 0.0000             | 0.4092     | 0.0000            | 0.0000             | 0.4877     | 0.0000            | 0.0000             | 0.2972     | 0.0000                                 | 0.0007             | 0.0382     | 0.0000            | 0.0011             | 0.0411     | 0.0000            | 0.0013             | 0.0210     |
| DG         | 0.0863                                 | 0.8364             | 0.7901     | 0.0990            | 0.8545             | 0.5196     | 0.1310            | 0.7389             | 0.2825     | 0.0227                                 | 0.1480             | 0.3295     | 0.0293            | 0.1663             | 0.5772     | 0.0435            | 0.1398             | 0.9442     |
| PD         | 0.2486                                 | 0.4186             | 0.4180     | 0.4063            | 0.4633             | 0.6932     | 0.5239            | 0.4345             | 0.8204     | 0.1296                                 | 0.9584             | 0.1195     | 0.2596            | 0.9264             | 0.3021     | 0.2824            | 0.8768             | 0.2477     |
| CH         | 0.0337                                 | 0.1627             | 0.3386     | 0.0469            | 0.1489             | 0.5892     | 0.0434            | 0.0709             | 0.5625     | 0.0244                                 | 0.0925             | 0.5090     | 0.0428            | 0.1266             | 0.6526     | 0.0516            | 0.1029             | 0.4570     |
| HO         | 0.5256                                 | 0.3181             | 0.1901     | 0.6015            | 0.2623             | 0.2460     | 0.5393            | 0.2822             | 0.4243     | 0.6573                                 | 0.1570             | 0.3771     | 0.6896            | 0.1630             | 0.3790     | 0.6705            | 0.1376             | 0.7028     |
| 3P         | 0.1765                                 | 0.4749             | 0.7002     | 0.2594            | 0.4639             | 0.6474     | 0.2761            | 0.5542             | 0.9881     | 0.2099                                 | 0.6168             | 0.8633     | 0.2843            | 0.5474             | 0.7435     | 0.2517            | 0.4749             | 0.8873     |
| AP         | 0.2517                                 | 0.0173             | 0.7634     | 0.2721            | 0.0178             | 0.8495     | 0.6073            | 0.0205             | 0.8664     | 0.1456                                 | 0.0027             | 0.3512     | 0.1701            | 0.0031             | 0.4356     | 0.3996            | 0.0029             | 0.6094     |
| CRT        | 0.1261                                 | 0.0002             | 0.7105     | 0.2880            | 0.0001             | 0.5600     | 0.5295            | 0.0002             | 0.5520     | 0.2231                                 | 0.0024             | 0.2723     | 0.4590            | 0.0025             | 0.1788     | 0.7226            | 0.0019             | 0.2083     |
| TD         | 0.5160                                 | 0.4164             | 0.3892     | 0.5843            | 0.4323             | 0.2578     | 0.4738            | 0.4795             | 0.0929     | 0.7941                                 | 0.2236             | 0.2425     | 0.7572            | 0.2372             | 0.4027     | 0.8830            | 0.2037             | 0.7621     |
| O          | 0.0060                                 | 0.5676             | 0.0200     | 0.0035            | 0.6013             | 0.0185     | 0.0060            | 0.4877             | 0.0568     | 0.0205                                 | 0.6969             | 0.1737     | 0.0133            | 0.6208             | 0.1821     | 0.0231            | 0.6937             | 0.4162     |
| C          | 0.0006                                 | 0.6066             | 0.4451     | 0.0002            | 0.5708             | 0.5205     | 0.0088            | 0.5370             | 0.4705     | 0.0003                                 | 0.9815             | 0.2116     | 0.0001            | 0.8438             | 0.3133     | 0.0036            | 0.9506             | 0.1632     |
| E          | 0.9034                                 | 0.8914             | 0.9489     | 0.6718            | 0.8233             | 0.7592     | 0.8552            | 0.8667             | 0.5405     | 0.8707                                 | 0.8206             | 0.9783     | 0.6898            | 0.8635             | 0.7220     | 0.8680            | 0.8861             | 0.5274     |
| A          | 0.0902                                 | 0.9853             | 0.8034     | 0.0735            | 0.9071             | 0.8348     | 0.1367            | 0.7089             | 0.7454     | 0.0419                                 | 0.4496             | 0.5986     | 0.0271            | 0.3907             | 0.4433     | 0.0432            | 0.3955             | 0.1223     |
| N          | 0.0005                                 | 0.2476             | 0.2710     | 0.0007            | 0.2812             | 0.2099     | 0.0168            | 0.3248             | 0.2605     | 0.0002                                 | 0.0679             | 0.0766     | 0.0003            | 0.0890             | 0.0606     | 0.0057            | 0.0715             | 0.0521     |

**Table A1.** Significance levels of two-way ANOVAS on each of the demographic variables of the study. Cells highlighted in light gray have a p-value of 0.05 or less; cells highlighted in dark gray have a p-value of 0.001 or less (Bonferroni corrected; 0.05/50). DG: Dictator Game; PD: Prisoner’s dilemma; CH: Charity task; HO: Honesty task; 3P: (Prosocial) Third-party punishment; AP: (Antisocial) Third-party punishment; TD: (log) Time discounting task. CRT: Cognitive reflective task; O: Openness; C: Conscientiousness; E: Extraversion; A: Agreeableness; N: Neuroticism.

**Table A2**

|             | Day versus Night |                |                 | Weekday versus Weekend |                |                 |
|-------------|------------------|----------------|-----------------|------------------------|----------------|-----------------|
|             | $\alpha=0.05$    | $\alpha=0.007$ | $\alpha=0.0024$ | $\alpha=0.05$          | $\alpha=0.007$ | $\alpha=0.0024$ |
| DG (\$0.50) | 0.032            | 0.040          | 0.044           | 0.030                  | 0.038          | 0.042           |
| PD (\$0.40) | 0.056            | 0.071          | 0.078           | 0.062                  | 0.078          | 0.086           |
| CH (\$60)   | 0.027            | 0.034          | 0.037           | 0.030                  | 0.037          | 0.041           |
| HO (\$0.50) | 0.037            | 0.047          | 0.051           | 0.039                  | 0.050          | 0.055           |
| 3P (\$0.10) | 0.054            | 0.068          | 0.075           | 0.061                  | 0.077          | 0.085           |
| AP (\$0.10) | 0.014            | 0.018          | 0.020           | 0.005                  | 0.006          | 0.007           |
| TD (2.98)   | 0.027            | 0.034          | 0.037           | 0.029                  | 0.037          | 0.040           |

**Table A2** Power analysis calculation for the incentivized tasks in the day versus night and weekday versus weekend comparisons. The default power is set to 0.80 and the level of alpha is set to three levels of conservativeness of Bonferroni correction:  $\alpha=0.05$ , or uncorrected;  $\alpha=0.007$ , corrected for one comparison or 0.05/7; and  $\alpha=0.0024$ , corrected for 3 comparisons or 0.05/21. DG: Dictator Game; PD: Prisoner's dilemma; CH: Charity task; HO: Honesty task; 3P: (Prosocial) Third-party punishment; AP: (Antisocial) Third-party punishment; TD: (log) Time discounting task. Numbers in parenthesis represent the endowment available in each task.

**Table A3**

|                 | <i>DG</i>            | <i>PD</i>            | <i>CH</i>            | <i>HO</i>           | <i>3P</i>           | <i>AP</i>            | <i>TD</i>            |
|-----------------|----------------------|----------------------|----------------------|---------------------|---------------------|----------------------|----------------------|
| Night (N)       |                      |                      |                      |                     |                     |                      |                      |
| Weekend (W)     |                      |                      |                      |                     |                     |                      |                      |
| Female          | 0.107*<br>(0.044)    |                      |                      |                     |                     |                      |                      |
| Age             | 0.006**<br>(0.002)   |                      |                      | 0.012***<br>(0.002) |                     |                      | -0.006***<br>(0.002) |
| Graduate        |                      |                      |                      |                     |                     |                      | -0.288***<br>(0.043) |
| Over \$35k      |                      |                      |                      |                     |                     |                      |                      |
| Democrat        |                      |                      |                      | -0.031*<br>(0.014)  | 0.051**<br>(0.016)  |                      | 0.029*<br>(0.13)     |
| God             |                      |                      |                      |                     | 0.028**<br>(0.011)  |                      |                      |
| Risk            |                      |                      | 0.025**<br>(0.008)   |                     |                     |                      | 0.025**<br>(0.009)   |
| Trust           | 0.048**<br>(0.014)   | 0.078***<br>(0.016)  | 0.060***<br>(0.013)  |                     |                     |                      | -0.029*<br>(0.013)   |
| Log(experience) | -0.097***<br>(0.023) | -0.167***<br>(0.028) | -0.108***<br>(0.023) | -0.077**<br>(0.022) | -0.090**<br>(0.027) |                      | 0.064**<br>(0.024)   |
| Log(time taken) | 0.641***<br>(0.127)  | 0.546***<br>(0.145)  | 0.797***<br>(0.119)  | 0.328**<br>(0.120)  |                     |                      | -0.276*<br>(0.129)   |
| Passed all      |                      |                      | -0.118**<br>(0.044)  |                     |                     |                      | -0.118**<br>(0.045)  |
| Usual time      |                      | 0.139*<br>(0.062)    |                      | -0.109*<br>(0.054)  |                     |                      |                      |
| CRT correct     | -0.049**<br>(0.019)  |                      | -0.074***<br>(0.018) |                     |                     | -0.060***<br>(0.014) | -0.129***<br>(0.019) |
| O               |                      |                      |                      |                     |                     |                      |                      |
| C               | -0.056**<br>(0.017)  | -0.067**<br>(0.019)  |                      |                     |                     |                      |                      |
| E               |                      |                      |                      | -0.034**<br>(0.013) |                     |                      |                      |
| A               | 0.068***<br>(0.019)  | 0.007**<br>(0.002)   |                      |                     |                     |                      |                      |
| N               |                      |                      |                      | -0.043**<br>(0.015) |                     |                      |                      |
| Constant        | -2.149***<br>(0.385) | -1.590***<br>(0.440) | -2.285***<br>(0.367) | -0.614<br>(0.371)   | -0.240*<br>(0.118)  | -0.138***<br>(0.036) | 1.114***<br>(0.393)  |
| N               | 1980                 | 1623                 | 2230                 | 2228                | 1410                | 1410                 | 2220                 |
| R <sup>2</sup>  | 0.072                | 0.065                | 0.083                | 0.043               | 0.017               | 0.017                | 0.079                |

**Table A3** (OLS) Regression results. Stepwise forward estimation for models with demographic and personality controls. \*\*\*  $p < 0.001$ ; \*\*  $p < 0.01$ ; \*  $p < 0.05$ . We performed preliminary regressions with a night and weekend interaction, none of them were significant. All controls had pairwise correlations within a  $\pm 0.37$  range. DG: Dictator Game; PD: Prisoner's dilemma; CH: Charity task; HO: Honesty task; 3P: (Prosocial) Third-party punishment; AP: (Antisocial) Third-party punishment; TD: (log) Time discounting task. CRT: Cognitive reflective task; O: Openness; C: Conscientiousness; E: Extraversion; A: Agreeableness; N: Neuroticism.

**Table A4**

|            | Time bin (T) | Day (D) | T x D  |
|------------|--------------|---------|--------|
| Female     | 0.1776       | 0.0529  | 0.1965 |
| Age        | 0.0004       | 0.3852  | 0.6717 |
| Graduate   | 0.1873       | 0.1709  | 0.3381 |
| Over \$35k | 0.048        | 0.5024  | 0.6489 |
| Democrat   | 0.9717       | 0.1157  | 0.9559 |
| God        | 0.3152       | 0.2085  | 0.5644 |
| Risk       | 0.0506       | 0.471   | 0.7739 |
| Trust      | 0.1065       | 0.2129  | 0.5479 |
| Log(Exp.)  | 0            | 0.0001  | 0.9659 |
| Log(Time)  | 0            | 0.0028  | 0.1025 |
| Passed all | 0.3164       | 0       | 0.9026 |
| Usual time | 0            | 0.0021  | 0.0927 |
| DG         | 0.0397       | 0.6571  | 0.7607 |
| PD         | 0.7158       | 0.0735  | 0.6446 |
| CH         | 0.0015       | 0.1671  | 0.184  |
| HO         | 0.5756       | 0.2469  | 0.6672 |
| 3P         | 0.1632       | 0.5621  | 0.561  |
| AP         | 0.6257       | 0.1369  | 0.4013 |
| CRT        | 0.2738       | 0.0015  | 0.6787 |
| TD         | 0.7576       | 0.2488  | 0.1313 |
| O          | 0.0535       | 0.7414  | 0.6437 |
| C          | 0.0009       | 0.6122  | 0.3798 |
| E          | 0.5395       | 0.6705  | 0.2418 |
| A          | 0.0784       | 0.6428  | 0.2371 |
| N          | 0.0124       | 0.103   | 0.4529 |

**Table A4** Significance levels of two-way ANOVAS on each of the demographics and tasks of the study. Time bin includes: *morning* (8am-2pm); *afternoon* (2pm-8pm); *evening* (8pm-2am); and *pre-dawn* (2am-8am). Day of the week includes the seven-day week (Monday-Sunday). Cells highlighted in light gray have a p-value of 0.05 or less. Cells highlighted in dark gray have a p-value of 0.001 or less (Bonferroni corrected; 0.05/50). DG: Dictator Game; PD: Prisoner's dilemma; CH: Charity task; HO: Honesty task; 3P: (Prosocial) Third-party punishment; AP: (Antisocial) Third-party punishment; TD: (log) Time discounting task. CRT: Cognitive reflective task; O: Openness; C: Conscientiousness; E: Extraversion; A: Agreeableness; N: Neuroticism.

**Table A5**

|                        | Female              | Age                  | Graduate            | > \$35k             | Pol. Party          | God                 | Risk                | Trust               | Log(Exp)             | Log(Time)           | Comp.               | Usual                |
|------------------------|---------------------|----------------------|---------------------|---------------------|---------------------|---------------------|---------------------|---------------------|----------------------|---------------------|---------------------|----------------------|
| <i>Time of day</i>     |                     |                      |                     |                     |                     |                     |                     |                     |                      |                     |                     |                      |
| 14:00-19:59            | -0.023<br>(0.029)   | -0.269<br>(0.654)    | -0.010<br>(0.029)   | -0.004<br>(0.029)   | 0.027<br>(0.088)    | -0.064<br>(0.145)   | 0.191<br>(0.146)    | 0.102<br>(0.090)    | -0.153**<br>(0.055)  | 0.010<br>(0.010)    | -0.005<br>(0.029)   | -0.055*<br>(0.023)   |
| 20:00-01:59            | 0.022<br>(0.028)    | -1.308*<br>(0.637)   | -0.023<br>(0.028)   | -0.056*<br>(0.028)  | 0.036<br>(0.086)    | 0.013<br>(0.142)    | 0.406**<br>(0.142)  | 0.055<br>(0.087)    | -0.327***<br>(0.054) | 0.040***<br>(0.010) | -0.021<br>(0.028)   | -0.126***<br>(0.022) |
| 02:00-07:59            | 0.040<br>(0.030)    | 1.499*<br>(0.683)    | -0.062*<br>(0.030)  | -0.065*<br>(0.030)  | 0.004<br>(0.092)    | 0.209<br>(0.152)    | 0.254<br>(0.153)    | -0.119<br>(0.094)   | -0.288***<br>(0.058) | 0.057***<br>(0.011) | -0.050<br>(0.030)   | -0.137***<br>(0.024) |
| <i>Day of the week</i> |                     |                      |                     |                     |                     |                     |                     |                     |                      |                     |                     |                      |
| Tuesday                | 0.011<br>(0.039)    | -0.103<br>(0.885)    | 0.090*<br>(0.039)   | 0.042<br>(0.039)    | 0.005<br>(0.119)    | 0.304<br>(0.197)    | -0.065<br>(0.197)   | 0.121<br>(0.121)    | 0.025<br>(0.075)     | 0.012<br>(0.014)    | 0.028<br>(0.039)    | 0.000<br>(0.031)     |
| Wednesday              | -0.041<br>(0.039)   | 0.091<br>(0.889)     | 0.018<br>(0.039)    | -0.004<br>(0.039)   | 0.190<br>(0.120)    | 0.116<br>(0.198)    | 0.011<br>(0.198)    | 0.036<br>(0.122)    | 0.102<br>(0.075)     | 0.011<br>(0.014)    | 0.137***<br>(0.039) | -0.014<br>(0.031)    |
| Thursday               | 0.029<br>(0.039)    | 0.576<br>(0.888)     | 0.062<br>(0.039)    | 0.049<br>(0.039)    | 0.268*<br>(0.120)   | 0.011<br>(0.198)    | 0.067<br>(0.198)    | 0.196<br>(0.122)    | 0.041<br>(0.075)     | 0.011<br>(0.014)    | 0.066<br>(0.039)    | -0.043<br>(0.031)    |
| Friday                 | 0.028<br>(0.040)    | -0.033<br>(0.894)    | 0.082*<br>(0.039)   | 0.060<br>(0.039)    | -0.018<br>(0.121)   | 0.366<br>(0.199)    | 0.212<br>(0.200)    | 0.226<br>(0.123)    | -0.117<br>(0.075)    | 0.041**<br>(0.014)  | 0.029<br>(0.039)    | -0.070*<br>(0.031)   |
| Saturday               | 0.095*<br>(0.039)   | 1.729<br>(0.891)     | 0.034<br>(0.039)    | 0.031<br>(0.039)    | 0.046<br>(0.120)    | 0.396*<br>(0.198)   | 0.150<br>(0.199)    | 0.067<br>(0.122)    | -0.211**<br>(0.075)  | 0.028*<br>(0.014)   | -0.026<br>(0.039)   | -0.113***<br>(0.031) |
| Sunday                 | 0.039<br>(0.039)    | 0.586<br>(0.885)     | 0.064<br>(0.039)    | -0.009<br>(0.039)   | 0.105<br>(0.119)    | 0.357<br>(0.197)    | 0.291<br>(0.197)    | -0.020<br>(0.121)   | -0.162*<br>(0.074)   | 0.050***<br>(0.014) | -0.032<br>(0.039)   | -0.066*<br>(0.031)   |
| Constant               | 0.468***<br>(0.033) | 33.841***<br>(0.748) | 0.425***<br>(0.033) | 0.442***<br>(0.033) | 4.445***<br>(0.101) | 3.549***<br>(0.166) | 4.465***<br>(0.167) | 4.328***<br>(0.102) | 2.680***<br>(0.063)  | 2.877***<br>(0.012) | 0.499***<br>(0.033) | 0.924***<br>(0.026)  |
| N                      | 2336                | 2334                 | 2334                | 2336                | 2336                | 2336                | 2336                | 2336                | 2313                 | 2336                | 2336                | 2336                 |
| R <sup>2</sup>         | 0.008               | 0.010                | 0.006               | 0.006               | 0.005               | 0.006               | 0.006               | 0.006               | 0.032                | 0.025               | 0.013               | 0.029                |

**Table A5** (OLS) Regression results of the demographics of the study. \*\*\*  $p < 0.001$ ; \*\*  $p < 0.01$ ; \*  $p < 0.05$ .

**Table A6**

|                        | DG                   | PD                   | CH                   | HO                   | 3P                  | AP                | CRT                 | TD                   | O                   | C                    | E                   | A                   | N                   |
|------------------------|----------------------|----------------------|----------------------|----------------------|---------------------|-------------------|---------------------|----------------------|---------------------|----------------------|---------------------|---------------------|---------------------|
| <i>Time of day</i>     |                      |                      |                      |                      |                     |                   |                     |                      |                     |                      |                     |                     |                     |
| 14:00-19:59            | -0.100<br>(0.789)    | 0.461<br>(1.076)     | 1.233<br>(0.816)     | 0.538<br>(0.898)     | -0.356<br>(0.273)   | 0.011<br>(0.080)  | 0.049<br>(0.069)    | 0.034<br>(0.040)     | -0.079<br>(0.073)   | -0.078<br>(0.073)    | -0.094<br>(0.095)   | -0.064<br>(0.070)   | 0.047<br>(0.086)    |
| 20:00-01:59            | 0.497<br>(0.771)     | 0.266<br>(1.069)     | 1.081<br>(0.794)     | -0.304<br>(0.873)    | -0.112<br>(0.266)   | 0.062<br>(0.078)  | -0.007<br>(0.067)   | 0.004<br>(0.039)     | 0.113<br>(0.071)    | -0.194**<br>(0.071)  | 0.029<br>(0.092)    | -0.172*<br>(0.068)  | -0.214*<br>(0.084)  |
| 02:00-07:59            | 2.040*<br>(0.835)    | 1.348<br>(1.156)     | 3.252***<br>(0.853)  | 0.914<br>(0.938)     | 0.220<br>(0.290)    | 0.093<br>(0.085)  | -0.093<br>(0.072)   | 0.034<br>(0.041)     | 0.009<br>(0.076)    | -0.290***<br>(0.076) | -0.051<br>(0.099)   | -0.090<br>(0.073)   | -0.119<br>(0.090)   |
| <i>Day of the week</i> |                      |                      |                      |                      |                     |                   |                     |                      |                     |                      |                     |                     |                     |
| Tuesday                | -0.555<br>(1.069)    | 0.485<br>(1.478)     | -0.331<br>(1.104)    | -0.097<br>(1.215)    | -0.211<br>(0.374)   | -0.144<br>(0.109) | -0.046<br>(0.094)   | -0.098<br>(0.054)    | 0.028<br>(0.098)    | 0.035<br>(0.099)     | 0.037<br>(0.128)    | 0.098<br>(0.095)    | 0.083<br>(0.117)    |
| Wednesday              | -0.610<br>(1.070)    | -0.477<br>(1.464)    | -1.795<br>(1.109)    | -0.594<br>(1.221)    | -0.374<br>(0.364)   | -0.067<br>(0.106) | -0.006<br>(0.094)   | -0.009<br>(0.054)    | 0.040<br>(0.099)    | 0.187<br>(0.099)     | 0.054<br>(0.129)    | 0.160<br>(0.095)    | 0.204<br>(0.118)    |
| Thursday               | -0.847<br>(1.071)    | -0.920<br>(1.487)    | -0.549<br>(1.108)    | -1.730<br>(1.220)    | -0.246<br>(0.369)   | -0.112<br>(0.108) | 0.002<br>(0.094)    | -0.016<br>(0.054)    | 0.094<br>(0.099)    | 0.175<br>(0.099)     | -0.109<br>(0.129)   | 0.102<br>(0.095)    | 0.264*<br>(0.117)   |
| Friday                 | 0.941<br>(1.082)     | 3.445*<br>(1.507)    | 0.433<br>(1.115)     | 0.540<br>(1.227)     | 0.154<br>(0.382)    | -0.108<br>(0.111) | -0.124<br>(0.095)   | -0.109*<br>(0.054)   | 0.157<br>(0.099)    | 0.120<br>(0.099)     | 0.015<br>(0.129)    | 0.118<br>(0.096)    | 0.152<br>(0.118)    |
| Saturday               | -0.229<br>(1.086)    | -0.136<br>(1.511)    | -0.401<br>(1.112)    | -0.754<br>(1.223)    | 0.013<br>(0.382)    | 0.173<br>(0.111)  | -0.255**<br>(0.094) | -0.021<br>(0.054)    | 0.092<br>(0.099)    | 0.123<br>(0.099)     | 0.118<br>(0.129)    | 0.122<br>(0.095)    | 0.042<br>(0.118)    |
| Sunday                 | 0.348<br>(1.077)     | -0.110<br>(1.539)    | 1.216<br>(1.103)     | 1.299<br>(1.214)     | -0.425<br>(0.373)   | -0.052<br>(0.109) | -0.296**<br>(0.094) | -0.028<br>(0.054)    | 0.031<br>(0.098)    | 0.084<br>(0.098)     | -0.068<br>(0.128)   | 0.057<br>(0.095)    | -0.038<br>(0.117)   |
| <i>Constant</i>        | 13.641***<br>(0.906) | 16.547***<br>(1.251) | 10.332***<br>(0.933) | 17.632***<br>(1.028) | 2.537***<br>(0.314) | 0.195*<br>(0.091) | 1.626***<br>(0.079) | -1.906***<br>(0.045) | 4.989***<br>(0.083) | 5.386***<br>(0.083)  | 3.659***<br>(0.108) | 5.235***<br>(0.080) | 4.909***<br>(0.099) |
| N                      | 2061                 | 1689                 | 2336                 | 2333                 | 1462                | 1462              | 2336                | 2326                 | 2322                | 2318                 | 2324                | 2309                | 2320                |
| R <sup>2</sup>         | 0.006                | 0.008                | 0.010                | 0.004                | 0.006               | 0.009             | 0.011               | 0.002                | 0.005               | 0.006                | 0.003               | 0.004               | 0.010               |

**Table A6** (OLS) Regression results of economic and personality tasks. \*\*\*  $p < 0.001$ ; \*\*  $p < 0.01$ ; \*  $p < 0.05$ . DG: Dictator Game; PD: Prisoner's dilemma; CH: Charity task; HO: Honesty task; 3P: (Prosocial) Third-party punishment; AP: (Antisocial) Third-party punishment; TD: (log) Time discounting task. CRT: Cognitive reflective task; O: Openness; C: Conscientiousness; E: Extraversion; A: Agreeableness; N: Neuroticism.

**Table A7**

|                   | Female              | Age                  | Graduate            | > \$35k             | Pol. Party          | God                 | Risk                | Trust               | Log(Exp)             | Log(Time)           | Comp.               | Usual                |
|-------------------|---------------------|----------------------|---------------------|---------------------|---------------------|---------------------|---------------------|---------------------|----------------------|---------------------|---------------------|----------------------|
| Participant order | 0.000**<br>(0.000)  | 0.000<br>(0.000)     | 0.000<br>(0.000)    | 0.000<br>(0.000)    | 0.000<br>(0.000)    | 0.000<br>(0.000)    | 0.000*<br>(0.000)   | 0.000<br>(0.000)    | -0.000***<br>(0.000) | 0.000**<br>(0.000)  | -0.000**<br>(0.000) | -0.000***<br>(0.000) |
| Constant          | 0.453***<br>(0.021) | 34.597***<br>(0.468) | 0.445***<br>(0.021) | 0.431***<br>(0.021) | 4.537***<br>(0.063) | 3.677***<br>(0.104) | 4.550***<br>(0.104) | 4.442***<br>(0.064) | 2.717***<br>(0.039)  | 2.906***<br>(0.007) | 0.563***<br>(0.021) | 0.860***<br>(0.016)  |
| N                 | 2336                | 2334                 | 2334                | 2336                | 2336                | 2336                | 2336                | 2336                | 2313                 | 2336                | 2336                | 2336                 |
| R <sup>2</sup>    | 0.003               | 0.001                | 0.000               | 0.000               | 0.000               | 0.001               | 0.003               | 0.000               | 0.000                | 0.004               | 0.004               | 0.007                |

**Table A7** (OLS) Regression results of each of the demographics included in this study. \*\*\*  $p < 0.001$ ; \*\*  $p < 0.01$ ; \*  $p < 0.05$  (Bonferroni corrections at the 0.001 level; 0.05/50).

**Table A8**

|                   | DG                   | PD                   | CH                  | HO                   | 3P                  | AP                  | CRT                  | TD                   | O                   | C                   | E                   | A                    | N                   |
|-------------------|----------------------|----------------------|---------------------|----------------------|---------------------|---------------------|----------------------|----------------------|---------------------|---------------------|---------------------|----------------------|---------------------|
| Participant order | 0.001<br>(0.000)     | 0.000<br>(0.001)     | 0.002***<br>(0.000) | 0.001<br>(0.000)     | 0.000**<br>(0.000)  | 0.000<br>(0.000)    | -0.000***<br>(0.000) | 0.000<br>(0.000)     | 0.000<br>(0.000)    | 0.000<br>(0.000)    | 0.000<br>(0.000)    | -0.000***<br>(0.000) | 0.000<br>(0.000)    |
| Constant          | 13.097***<br>(0.559) | 17.160***<br>(0.773) | 9.646***<br>(0.582) | 16.706***<br>(0.640) | 1.839***<br>(0.192) | 0.200***<br>(0.056) | 1.703***<br>(0.049)  | -1.939***<br>(0.028) | 5.098***<br>(0.052) | 5.373***<br>(0.052) | 3.602***<br>(0.067) | 5.434***<br>(0.050)  | 5.027***<br>(0.062) |
| N                 | 2061                 | 1689                 | 2336                | 2333                 | 1462                | 1462                | 2336                 | 2326                 | 2322                | 2318                | 2324                | 2309                 | 2320                |
| R <sup>2</sup>    | 0.002                | 0.000                | 0.005               | 0.001                | 0.005               | 0.000               | 0.009                | 0.000                | 0.000               | 0.000               | 0.000               | 0.008                | 0.001               |

**Table A8** (OLS) Regression results of economic and personality tasks. \*\*\*  $p < 0.001$ ; \*\*  $p < 0.01$ ; \*  $p < 0.05$  (Bonferroni corrections at the 0.001 level; 0.05/50). DG: Dictator Game; PD: Prisoner's dilemma; CH: Charity task; HO: Honesty task; 3P: (Prosocial) Third-party punishment; AP: (Antisocial) Third-party punishment; TD: (log) Time discounting task. CRT: Cognitive reflective task; O: Openness; C: Conscientiousness; E: Extraversion; A: Agreeableness; N: Neuroticism.

**Figure A1**

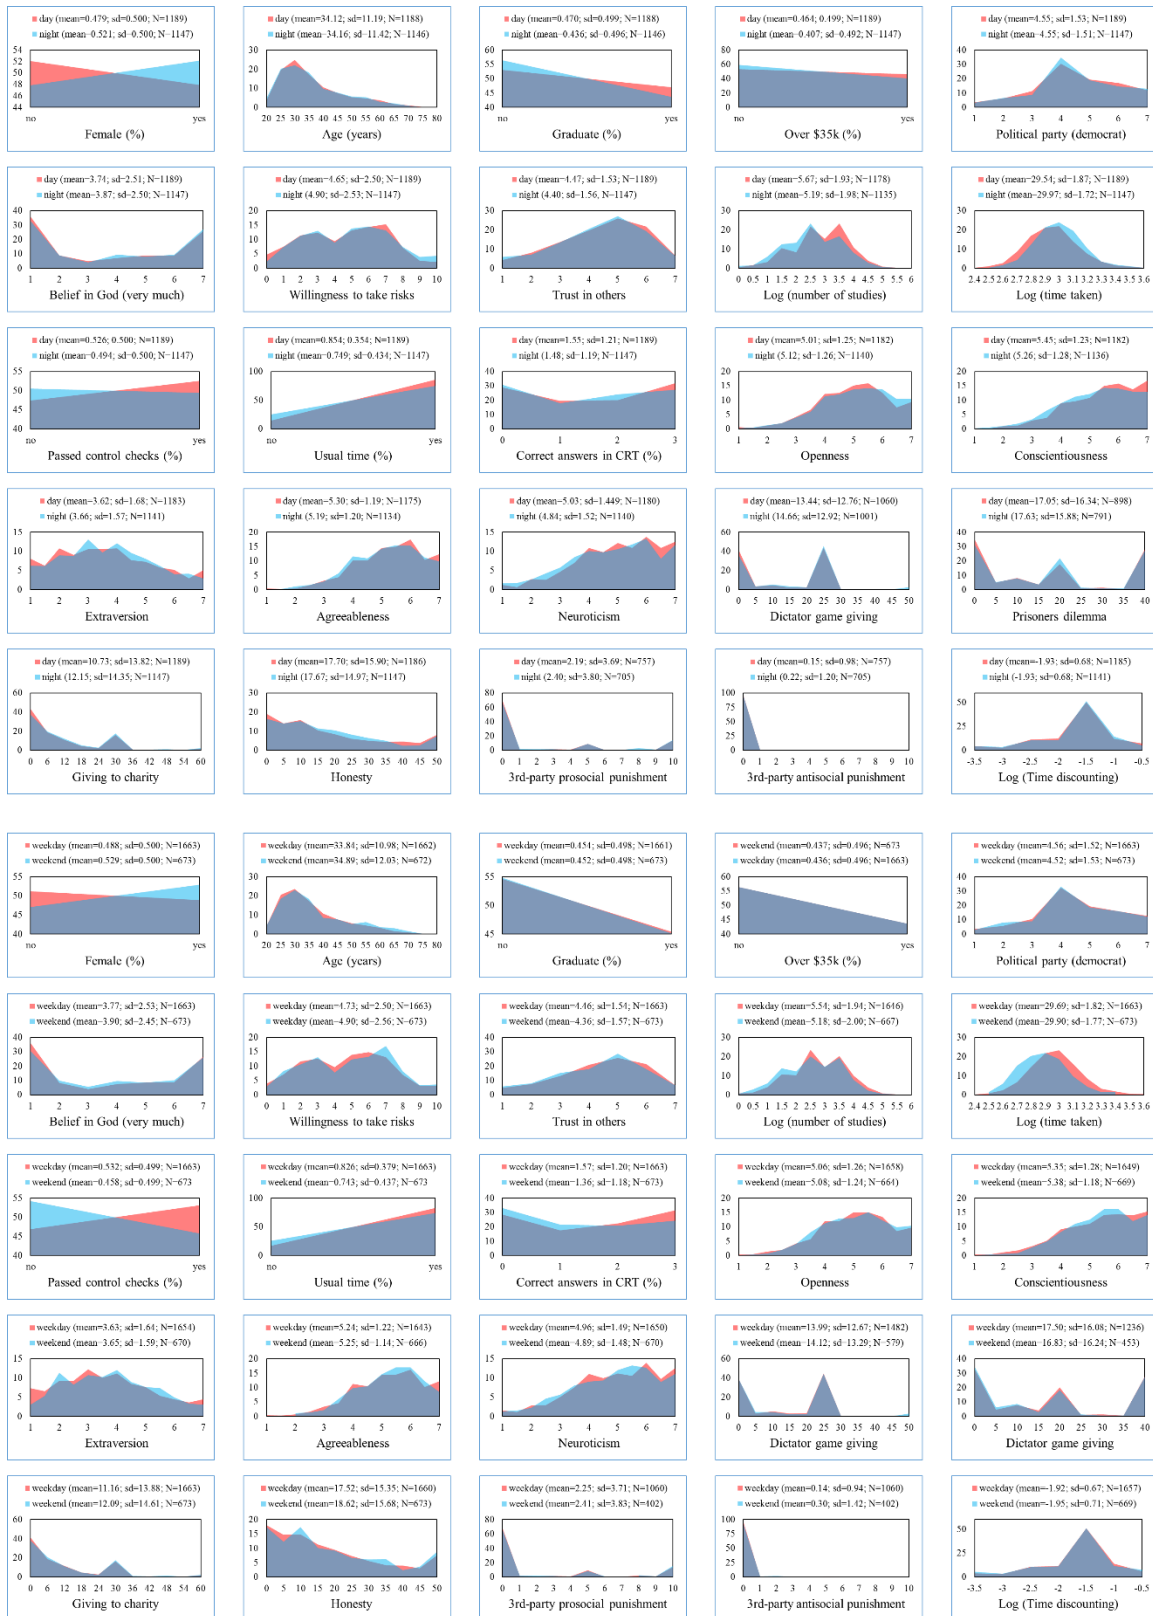

**Figure A1** Histogram of frequencies of each of the variables studied, by day vs night, and weekday vs weekend



**Figure A2**

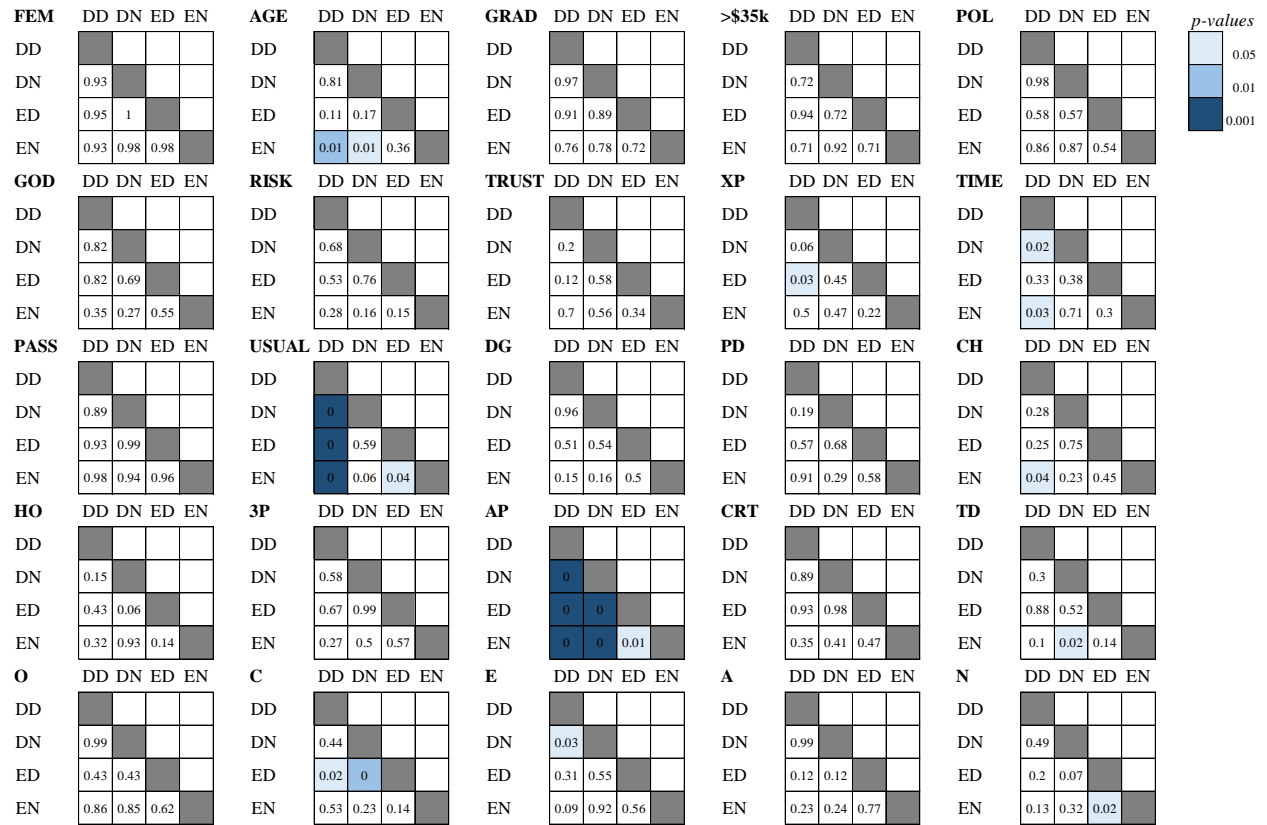

**Figure A2** Variance-comparison tests between nights and weekends; p-values reported. DD: Weekday day; DN: Weekday night; ED: Weekend day; EN: Weekend night. DG: Dictator Game; PD: Prisoner’s dilemma; CH: Charity task; HO: Honesty task; 3P: (Prosocial) Third-party punishment; AP: (Antisocial) Third-party punishment; TD: (log) Time discounting task. CRT: Cognitive reflective task; O: Openness; C: Conscientiousness; E: Extraversion; A: Agreeableness; N: Neuroticism.

**Figure A3**

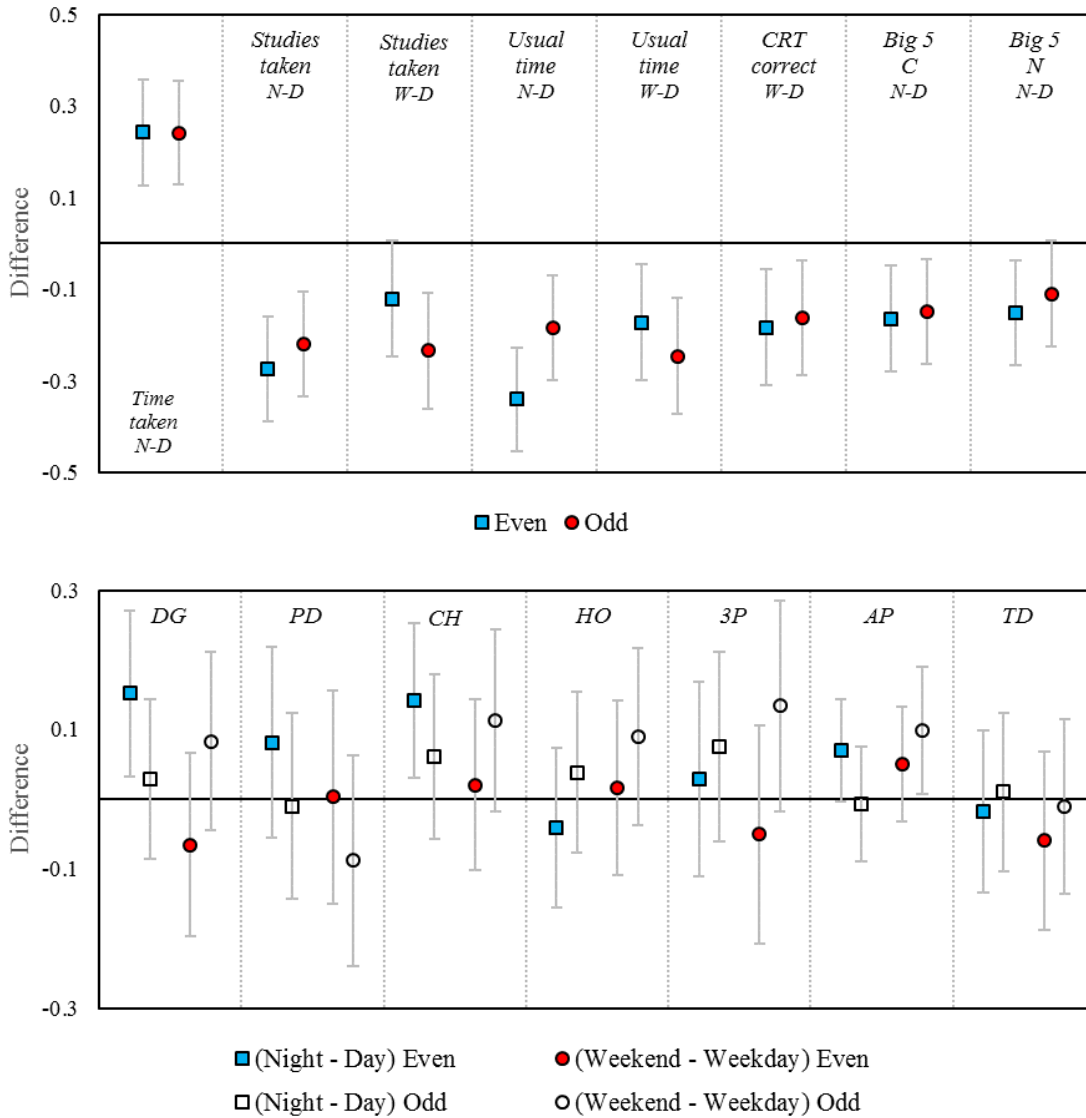

**Figure A3** Differences in demographics, economic game behavior, and personality traits, by order of participation (even/odd); 95% confidence intervals reported. Variables standardized to ensure equivalent distributions; positive values in the figure indicate higher values of the dependent variable during the day *vs.* the night, and weekday *vs.* weekend. DG: Dictator Game; PD: Prisoner's dilemma; CH: Charity task; HO: Honest task; 3P: (Prosocial) Third-party punishment; AP: (Antisocial) Third-party punishment; TD: (log) Time discounting task. CRT: Cognitive reflective task; C: Conscientiousness; N: Neuroticism.

**Figure A4**

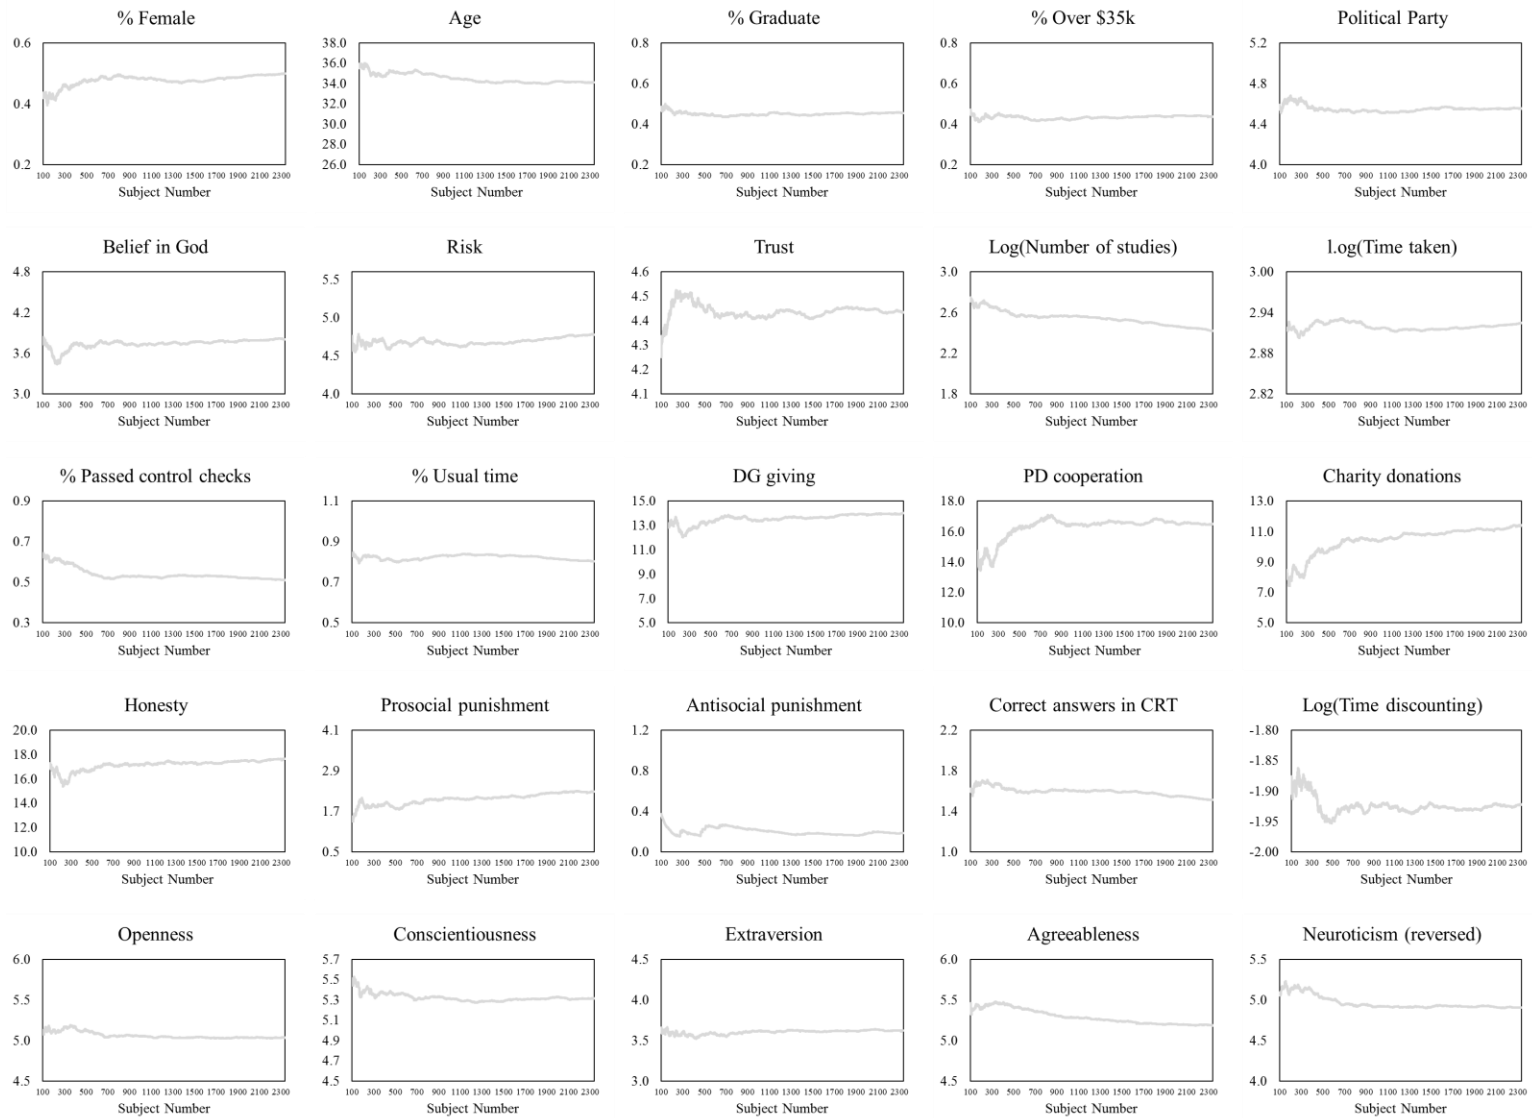

**Figure A4** Cumulative average of each of the demographics and tasks of this study, by the chronological order of participation.

## Experimental Instructions

*Breaks between pages shown as long lines.*

**To begin, please enter your Amazon Mechanical Turk Worker ID here:**

(Please see below for where you can find your Worker ID.)

Your Worker ID starts with the letter A and has 12-14 letters or numbers. It is NOT your email address. If we do not have your correct Worker ID we will not be able to pay you.

Note that your Worker ID can be found on your dashboard page:

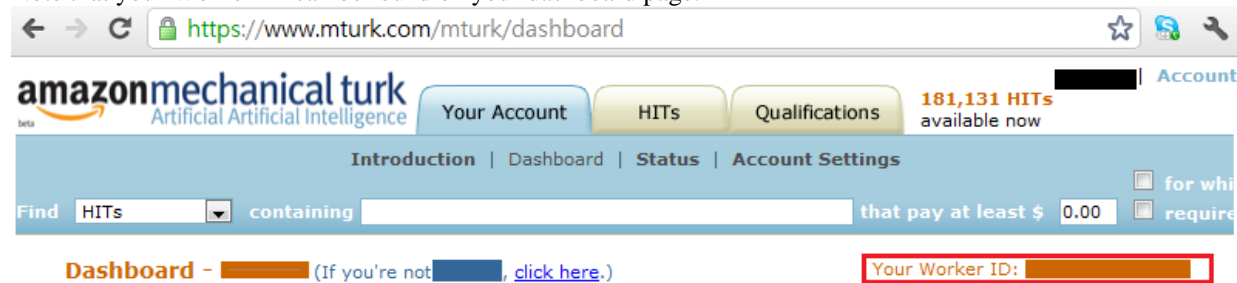

---

This experiment consists of several sections. In each section you will be called to make one or more decisions. We don't want what happens in one section to affect your decisions in another. So at the end of the study we will randomly choose one section and use its outcomes to determine your bonus payment.

Thus, because only one interaction will count, but you don't know which one it will be, you should treat each decision as if it is the only one that matters for your final payoff.

When you are ready for the first section, press >> to continue.

---

### New Section

In this section, you will play in a three-person game. You have been randomly assigned to interact with two other MTurk workers. You will be Player 3. The other people will be Players 1 and 2. All three of you receive this same set of instructions. You cannot participate in this interaction again: you can only play this game once.

In addition to the payment you each receive for participating in this HIT, you can earn more as a bonus, as follows:

In Stage 1:

- Player 1 is given 50 cents.
- Player 1 decides how many of the 50 cents to share with Player 2. Player 1 can share either 0 or 25 cents.
- Player 3 receives 50 cents (no matter what Player 1 chooses).

In Stage 2:

- Player 3 can then spend up to 10 cents to reduce Player 1's bonus. For every cent Player 3 spends, Player 1 loses 3 cents.

Player 1's total bonus is therefore the money Player 1 keeps minus the money Player 3 causes Player 1 to lose.

Player 2's total bonus is therefore the money Player 1 transfers to Player 2.

Player 3's total bonus is therefore 50 cents minus the money Player 3 spends on reducing Player 1's bonus.

Please answer the following questions, to make sure you understand the game. You MUST answer ALL questions correctly to receive your bonus!

Imagine that Player 1 is deciding whether or not to share with Player 2.

If Player 3 does not decide to reduce Player 1's bonus, which decision will result in Player 1 earning the highest payoff?

- Player 1 deciding to share
- Player 1 deciding NOT to share
- Neither - Player 1's payoff is not influenced by this decision

Imagine that Player 1 is deciding whether or not to share with Player 2. Which decision will result in Player 2 earning the highest payoff?

- Player 1 deciding to share
- Player 1 deciding NOT to share
- Neither - Player 2's payoff is not influenced by this decision

Imagine that Player 3 is deciding whether or not to reduce Player 1's bonus. Which decision will result in Player 1 earning the highest payoff?

- Player 3 deciding to reduce Player 1's bonus
- Player 3 deciding NOT to reduce Player 1's bonus
- Neither - Player 1's payoff is not influenced by your decision
- 

Imagine that Player 3 is deciding whether or not to reduce Player 1's bonus. Which decision will result in Player 3 earning the highest payoff?

- Player 3 deciding to reduce Player 1's bonus
- Player 3 deciding NOT to reduce Player 1's bonus
- Neither - your payoff is not influenced by your decision

The game is now in Stage 2. As Player 3, you have received 50 cents. You now have the option to spend up to 10 cents to reduce Player 1's total bonus.

Remember, for every 1 cent you spend, Player 1 loses 3 cents.

You can base your decision on Player 1's choice in Stage 1.

How many of your 50 cents (if any) would you like to spend on reducing Player 1's bonus if...

|                                                                | 0 cents               | 1 cent                | 2 cents               | 3 cents               | 4 cents               | 5 cents               | 6 cents               | 7 cents               | 8 cents               | 9 cents               | 10 cents              |
|----------------------------------------------------------------|-----------------------|-----------------------|-----------------------|-----------------------|-----------------------|-----------------------|-----------------------|-----------------------|-----------------------|-----------------------|-----------------------|
| Player 1 chose to keep 50 cents and give 0 cents to Player 2?  | <input type="radio"/> |
| Player 1 chose to keep 25 cents and give 25 cents to Player 2? | <input type="radio"/> |

The choice that you make on this page will determine how much bonus you and Player 1 actually receive.

Once the HIT is over, we will calculate bonuses and you will be told what Player 1 chose in Stage 1.

We will see how much you wanted to spend to reduce Player 1's bonus given Player 1's actual choice. Then, we will reduce Player 1's bonus based on that decision. We will also determine your bonus based on that decision.

### New Section

In this section one participant selected randomly from this study can earn \$60.

How much of this \$60 bonus you would like to donate to Oxfam if you win it?

(Oxfam is a non-governmental organization that focuses on hunger, poverty, and similar global issues. You will keep the money that you do not donate.)

- \$0
- \$6
- \$12
- \$18
- \$24
- \$30
- \$36
- \$42
- \$48
- \$54
- \$60

### New Section

In this section you are matched with one other brand new person.

One of you will be person A, one of you will be person B.

Person A starts with 50 cents and person B starts with 0.

*This interaction has one single decision:*

1) Person A will choose how many of the 50 cents to transfer to person B

Person B will get the number of points A transfers and A will get to keep the rest.

The graphic below shows a summary of the interaction:

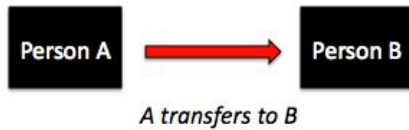

You MUST answer these questions correctly to receive your bonus! For person A, what transfer maximizes person B's payoff?

- 0
- 10
- 20
- 30
- 40
- 50
- All transfer levels earn the same amount

For person A, what transfer maximizes person A's payoff?

- 0
  - 10
  - 20
  - 30
  - 40
  - 50
  - All transfer levels earn the same amount
- 

### Person A

If you are person A in the interaction, how much will you transfer to person B?

- 0
  - 5
  - 10
  - 15
  - 20
  - 25
  - 30
  - 35
  - 40
  - 45
  - 50
- 

### New Section

In this task, your pay will be determined by whether you correctly guess a randomly drawn number between 1 and 20. Please read the instructions.

On the next page, you will see a randomly generated number between 1 and 20. Before seeing the number, you will be asked to guess the number you are about to see (a number between 1-20). After seeing the number, you will report whether your guess was correct or incorrect.

Your bonus for this task will be paid as follows:

- If your guess is correct, you will earn \$0.50
- For every number by which you are off, you will earn \$0.05 less
- If you are off by 10 or more numbers, you will earn \$0.00

For Example:

The random number is 5.

If you would guess 6, you would earn \$0.45.

If you would guess 1, you would earn \$0.30.

If you would guess 15, you would earn \$0.00.

Please guess which number between 1 and 20 you are about to see.

When you have made a guess, go to the next page.

---

The number is **XX**.

- I guessed CORRECTLY \$0.50
  - I was off by 1 \$0.45
  - I was off by 2 \$0.40
  - I was off by 3 \$0.35
  - I was off by 4 \$0.30
  - I was off by 5 \$0.25
  - I was off by 6 \$0.20
  - I was off by 7 \$0.15
  - I was off by 8 \$0.10
  - I was off by 9 \$0.05
  - I was off by 10 or more \$0.00
- 

### **New Section**

You have been randomly assigned to interact with another MTurk worker. Both of you receive this same set of instructions. You cannot participate in this study more than once.

Both of you are given 40 cents for this interaction. You each decide how much of your 40 cents to keep for yourself, and how much (if any) to give to the other person.

Any money you give to the other person will be doubled. Thus, for every 1 cent you give to the other person, he or she will receive 2 cents.

If both of you choose to give away all of your 40 cents, each of you will double your money: each of you will earn 80 cents.

But if the other person sends all of his or her 40 cents to you, while you keep all of your 40 cents for yourself, you will earn 120 cents, while the other person will earn 0 cents.

No matter what the other person chooses, you earn the most by keeping all of your money.

The other person is REAL and will really make a decision – there is no deception in this study.

Once you and the other person have chosen how much to give, the interaction is over.

You MUST answer these questions correctly to receive your bonus! How many cents would you give to the other person in order to maximize the other person's earnings?

- 0
- 10
- 20
- 30
- 40

How many cents would you give to the other person in order to maximize your own earnings?

- 0
  - 10
  - 20
  - 30
  - 40
- 

Please choose how many cents you will send to the other person:

\_\_\_\_\_

---

### **New Section**

In this section one participant selected randomly from this study can earn up to \$60. Please read the following paragraphs carefully.

For each of the following 10 questions you decide whether you prefer to be paid a certain amount today or a larger amount later. You must select one option for each question.

At the end of the study one participant and one question will be selected randomly. The winner will receive the associated bonus according to the choice made.

Please answer the questions quickly and honestly.

1. Would you rather have

- \$54 Today
- \$55 in 117 Days

2. Would you rather have

- \$47 Today
- \$50 in 160 Days

3. Would you rather have

- \$25 Today
- \$60 in 14 Days

4. Would you rather have

- \$40 Today
- \$55 in 62 Days

5. Would you rather have

- \$27 Today
- \$50 in 21 Days

6. Would you rather have

- \$49 Today
- \$60 in 89 Days

7. Would you rather have

- \$34 Today
- \$50 in 30 Days

8. Would you rather have

- \$54 Today
- \$60 in 111 Days

9. Would you rather have

- \$20 Today
  - \$55 in 7 Days
- 

Here are a number of personality traits that may or may not apply to you. Please write a number next to each statement to indicate the extent to which you agree or disagree with that statement. You should rate the extent to which the pair of traits applies to you, even if one characteristic applies more strongly than the other.

*I see myself as:*



Extraverted, enthusiastic.

- 1 - Disagree strongly
- 2
- 3
- 4
- 5
- 6
- 7 - Agree strongly

Critical, quarrelsome.

- 1 - Disagree strongly
- 2
- 3
- 4
- 5
- 6
- 7 - Agree strongly

Dependable, self-disciplined.

- 1 - Disagree strongly
- 2
- 3
- 4
- 5
- 6
- 7 - Agree strongly

Anxious, easily upset.

- 1 - Disagree strongly
- 2
- 3
- 4
- 5
- 6
- 7 - Agree strongly

Open to new experiences, complex.

- 1 - Disagree strongly
- 2
- 3
- 4
- 5
- 6
- 7 - Agree strongly

Reserved, quiet.

- 1 - Disagree strongly
- 2
- 3
- 4
- 5
- 6
- 7 - Agree strongly

Sympathetic, warm.

- 1 - Disagree strongly
- 2
- 3
- 4
- 5
- 6
- 7 - Agree strongly

Disorganized, careless.

- 1 - Disagree strongly
- 2
- 3
- 4
- 5
- 6
- 7 - Agree strongly

Calm, emotionally stable.

- 1 - Disagree strongly
- 2
- 3
- 4
- 5
- 6
- 7 - Agree strongly

Conventional, uncreative.

- 1 - Disagree strongly
- 2
- 3
- 4
- 5
- 6
- 7 - Agree strongly

---

In this section you will be asked three questions. Please do your best to answer as accurately as possible.

---

The ages of Mark and Adam add up to 28 years total. Mark is 20 years older than Adam. How many years old is Adam?

---

If it takes 10 second for 10 printers to print out 10 pages of paper, how many seconds will it take 50 printers to print out 50 pages of paper?

---

On a loaf of bread, there is a patch of mold. Every day, the patch doubles in size. If it takes 40 days for the patch to cover the entire loaf of bread, how many days would it take for the patch to cover half of the loaf of bread?

---

What is your age?

Gender?

- Male
- Female

Highest level of education completed:

- Less than a high school degree
- High School Diploma
- Vocational Training
- Attended College
- Bachelor's Degree
- Graduate Degree
- Unknown

Please choose the category that describes the total amount of income you earned in 2013. Consider all forms of income, including salaries, tips, interest and dividend payments, scholarship support, student loans, parental support, social security, alimony, and child support, and others.

- Under \$5,000
- \$5,000-\$10,000
- \$10,001-\$15,000
- \$15,001-\$25,000
- \$25,001-\$35,000
- \$35,001-\$50,000
- \$50,001-\$65,000
- \$65,001-\$80,000
- \$80,001-\$100,000
- Over \$100,000

How do you see yourself: are you generally a person who is fully prepared to take risks or do you try to avoid taking risks?

- 0 - Not at all willing to take risks
- 1
- 2
- 3
- 4
- 5
- 6
- 7
- 8
- 9
- 10 - Very willing to take risks

To what extent do you feel you can trust other people that you interact with in your daily life?

- 1 - Very little
- 2
- 3
- 4
- 5
- 6
- 7 - Very much

I would rather do something that requires little thought than something that is sure to challenge my thinking abilities.

- 1 - Very untrue
- 2
- 3
- 4
- 5 - Very true

I trust my initial feelings about people.

- 1 - Very untrue
- 2
- 3
- 4
- 5 - Very true

Which US political party do you identify with more strongly?

- 1-Strongly Republican
- 2
- 3
- 4-Neutral
- 5
- 6
- 7-Strongly Democrat

How strongly do you believe in the existence of a God or Gods?

- 1 - Very little
- 2
- 3
- 4
- 5
- 6
- 7 - Very much

In the text box below, please describe why you made the decisions that you did in this study.

Please indicate your current degree of emotion, meaning such characteristics as how pleasant or unpleasant you feel.

- 1: extremely sad
- 2
- 3
- 4
- 5
- 6
- 7
- 8
- 9: extremely happy

Politically, how conservative are you in terms of social issues

- 1 - Very liberal
- 2
- 3
- 4
- 5
- 6 - Very conservative

Politically, how conservative are you in terms of fiscal issues

- 1 - Very liberal
- 2
- 3
- 4
- 5
- 6 - Very conservative

When you fly, which type of seat do you prefer?

- Aisle
- Window
- Middle
- Don't have a preference
- Don't fly

Do you usually work on HITs at this time of the day?

- Yes
- No

Do you smoke?

- No
- Yes

What is your marital status?

- Single, never married
- Married or domestic partnership
- Widowed
- Divorced
- Separated

Are you currently...?

- Employed for wages
- Self-employed
- Out of work and looking for work
- Out of work but not currently looking for work
- A homemaker
- A student
- Military
- Retired
- Unable to work

About how many surveys/studies have you participated in on MTurk before?

About how many surveys/studies have you participated with us (online research studies)?

Please let us know how much you have participated in the following types of HITs on Amazon Mechanical Turk:

|                                                        | Never                 | Rarely                | Sometimes             | Often                 | All of the Time       |
|--------------------------------------------------------|-----------------------|-----------------------|-----------------------|-----------------------|-----------------------|
| Transcribe audio or video                              | <input type="radio"/> |
| Review text or video                                   | <input type="radio"/> |
| Answer survey questions                                | <input type="radio"/> |
| Divide money between yourself and others               | <input type="radio"/> |
| Edit text (e.g. for English as a 2nd language writers) | <input type="radio"/> |
| Find contact info (e.g. phone number, address, etc.)   | <input type="radio"/> |
| Website content review                                 | <input type="radio"/> |
| Write an essay                                         | <input type="radio"/> |

To what extent have you previously participated in other studies like to this one (i.e. that involve the dividing up of money)?

- 1 - Nothing like this scenario
- 2
- 3 - Something like this scenario
- 4
- 5 - Exactly this scenario

Unlike some other requesters on Mechanical Turk, we never use deception in our studies. Your actions and the actions of others in the study really did affect the bonuses that other individuals will earn. For our own records, to what extent did you believe that the other people were real when making your decision?

- 1 - Very skeptical that others were real
- 2
- 3
- 4
- 5
- 6
- 7 - Very confident that others were real
